# Supplementary material
Source: PubMed Central journal article supplement (PMC4456650)
Supplement: supp_tpc.15.00207_TPC2015-00207-RAR1_Supplemental_Data.pdf [file supp_tpc.15.00207_TPC2015-00207-RAR1_Supplemental_Data.pdf]

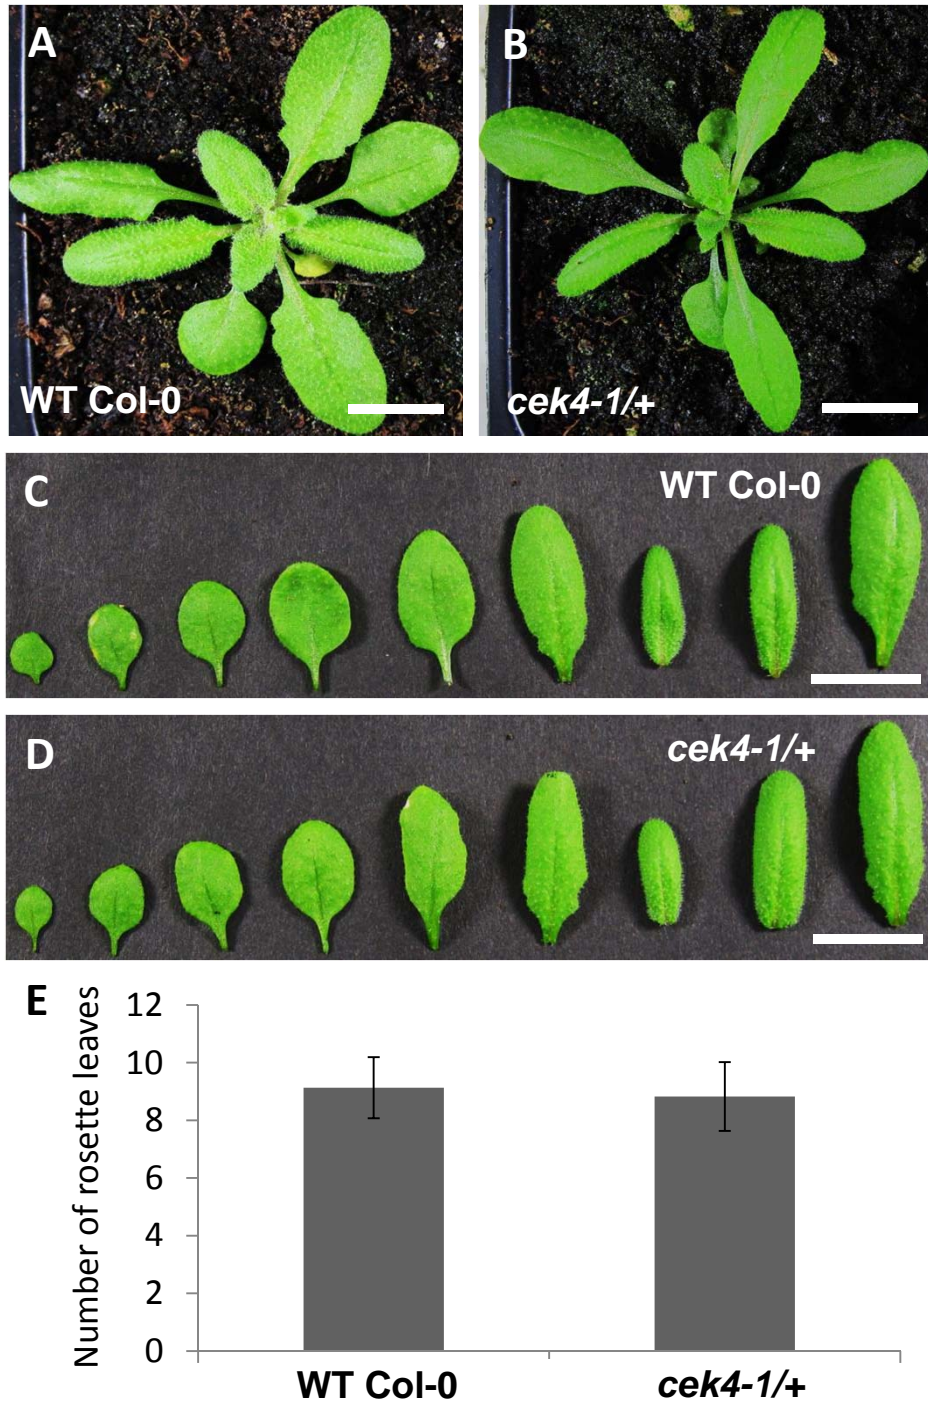

**Supplemental Figure 1:** Vegetative growth phenotype of 28-day old *cek4-1/+* mutant. **(A-D)** Overview **(A,B)** and detached rosette leaves **(C,D)** of the wild type (WT) Col-0 **(A,C)** and *cek4-1/+* mutant **(B,D)**. **(E)** Flowering time of *cek4-1/+* and wild type Col-0.  $n=32$ , Error bars are SD, Bars, 1 cm.

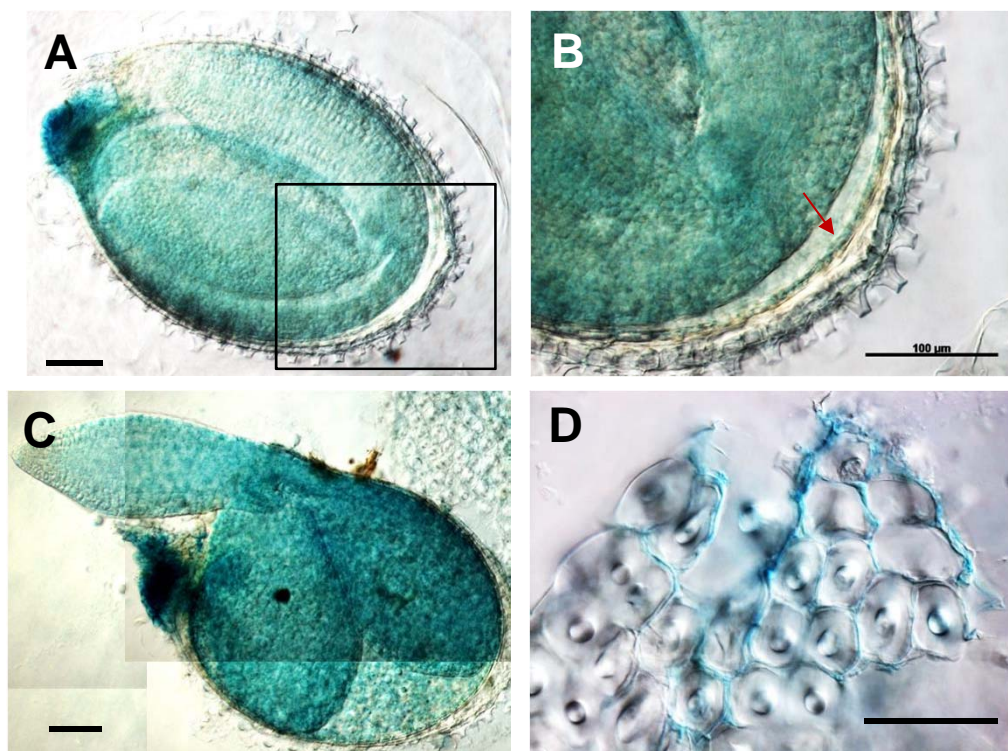

**Supplemental Figure 2:** Expression of CEK4 in mature seeds by histochemical GUS staining of *ProCEK4:CEK4-GUS cek4-1/-*. **(A)** Mature seed of *ProCEK4:CEK4-GUS cek4-1/-* showing GUS stain in embryos and the chalazal region. A box indicates the region magnified in **(B)**. **(B)** Magnified image of **(A)** indicating the aleurone layer (red arrow) stained with GUS. **(C)** The embryo separated from the testa showing GUS stain in the endosperm region. **(D)** The aleurone layer separated from the seed coat. Bars in panels A, B and C, 100  $\mu\text{m}$ ; D, 50  $\mu\text{m}$ .

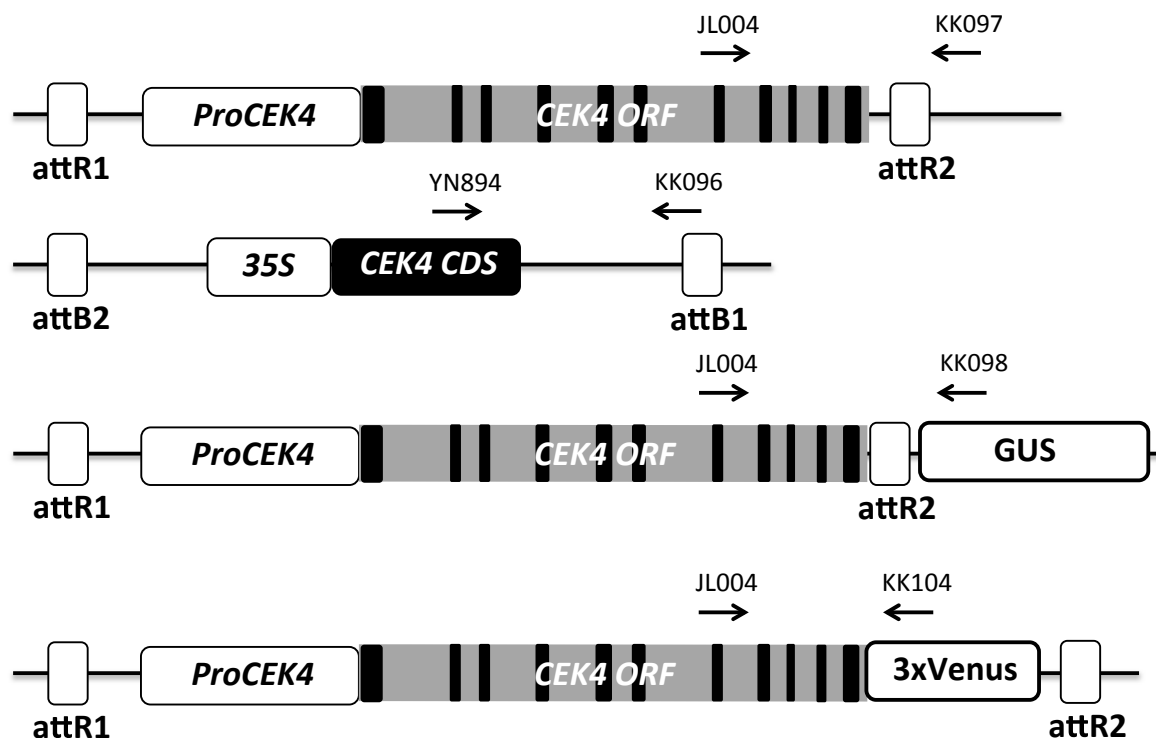

**Supplemental Figure 3:** Annealing position of primers used for genotyping in Fig. 4J. The diagrams show structure of plasmid vectors constructed in this work. Black box, exon; gray box, intron; white box, other sequences; line, plasmid vector sequence; arrows, annealing position of the primers. CDS, protein coding sequences; ORF, open reading frame; Pro, promoter.

**Supplemental Table 1:** The Arabidopsis CEK gene family.

| Name        | Gene locus | Amino acid | Molecular mass (Da) | TMD |
|-------------|------------|------------|---------------------|-----|
| <i>CEK1</i> | At1g71697  | 346        | 40,016              | 0   |
| <i>CEK2</i> | At1g74320  | 350        | 41,016              | 0   |
| <i>CEK3</i> | At4g09760  | 346        | 40,350              | 0   |
| <i>CEK4</i> | At2g26830  | 374        | 42,859              | 0   |

TMD, transmembrane domain

**Supplemental Table 2:** Polar glycerolipid composition (mol%) of the fourteen-day-old seedlings of homozygous *cek1-1*, *cek2-1* and *cek3-1* mutants and the wild type (WT) Col-0 and Col-8 as controls.

|               | <i>cek1-1</i> |       | <i>cek2-1</i> |       | <i>cek3-1</i> |       | WT (Col-0) |       | WT (Col-8) |       |
|---------------|---------------|-------|---------------|-------|---------------|-------|------------|-------|------------|-------|
| <b>MGDG</b>   | 35.0          | ± 2.4 | 32.6          | ± 1.0 | 34.5          | ± 0.5 | 34.0       | ± 0.9 | 35.3       | ± 0.8 |
| <b>DGDG</b>   | 15.1          | ± 1.5 | 16.5          | ± 2.2 | 13.2          | ± 2.5 | 14.0       | ± 2.4 | 16.2       | ± 1.3 |
| <b>PtdCho</b> | 22.2          | ± 1.1 | 22.9          | ± 1.4 | 24.4          | ± 2.6 | 24.3       | ± 2.3 | 21.5       | ± 1.1 |
| <b>PtdEtn</b> | 12.4          | ± 1.1 | 13.2          | ± 1.1 | 14.9          | ± 2.1 | 12.6       | ± 1.2 | 12.8       | ± 0.9 |
| <b>PtdGro</b> | 9.5           | ± 0.7 | 8.8           | ± 1.1 | 7.9           | ± 2.6 | 9.4        | ± 0.7 | 9.2        | ± 0.3 |
| <b>PtdIno</b> | 5.8           | ± 0.9 | 6.1           | ± 0.7 | 5.2           | ± 0.9 | 5.7        | ± 0.4 | 5.1        | ± 0.1 |

Data are mean±SD from 3 biological replicates.

**Supplemental Table 3:** Fatty acid composition (mol%) of the polar glycerolipid classes in fourteen-day-old seedlings of *cek1-1*, *cek2-1*, *cek3-1* and the wild types (WTs) Col-0 and Col-8.

|               | <i>cek1-1</i> |              | <i>cek2-1</i> |              | <i>cek3-1</i> |  | WT (Col-8) |  | WT (Col-0) |  |
|---------------|---------------|--------------|---------------|--------------|---------------|--|------------|--|------------|--|
| <b>MGDG</b>   |               |              |               |              |               |  |            |  |            |  |
| 16:0          | 3.52 ± 1.74   | 3.43 ± 0.67  | 3.46 ± 0.64   | 2.65 ± 0.78  | 2.64 ± 0.71   |  |            |  |            |  |
| 16:1          | 1.11 ± 0.27   | 0.99 ± 0.50  | 0.87 ± 0.04   | 1.36 ± 0.51  | 1.15 ± 0.17   |  |            |  |            |  |
| 16:2          | 2.17 ± 0.30   | 2.32 ± 0.39  | 2.19 ± 0.62   | 2.51 ± 0.68  | 2.53 ± 0.38   |  |            |  |            |  |
| 16:3          | 28.80 ± 1.66  | 27.11 ± 4.69 | 25.25 ± 2.27  | 28.91 ± 2.54 | 28.59 ± 3.11  |  |            |  |            |  |
| 18:0          | 0.81 ± 0.43   | 0.86 ± 0.10  | 0.83 ± 0.36   | 0.76 ± 0.36  | 0.61 ± 0.11   |  |            |  |            |  |
| 18:1          | 0.72 ± 0.18   | 0.88 ± 0.17  | 1.45 ± 0.80   | 0.95 ± 0.71  | 1.06 ± 0.52   |  |            |  |            |  |
| 18:2          | 2.88 ± 0.44   | 3.80 ± 1.33  | 5.13 ± 2.86   | 3.68 ± 1.25  | 4.24 ± 1.86   |  |            |  |            |  |
| 18:3          | 59.99 ± 2.29  | 60.61 ± 3.95 | 60.83 ± 1.68  | 59.18 ± 1.73 | 59.19 ± 0.62  |  |            |  |            |  |
| <b>DGDG</b>   |               |              |               |              |               |  |            |  |            |  |
| 16:0          | 15.87 ± 2.45  | 14.15 ± 2.95 | 13.77 ± 2.91  | 14.31 ± 0.31 | 13.56 ± 1.14  |  |            |  |            |  |
| 16:1          | 0.82 ± 0.31   | 1.02 ± 0.60  | 1.07 ± 0.78   | 1.17 ± 0.65  | 1.31 ± 0.23   |  |            |  |            |  |
| 16:2          | 3.10 ± 0.68   | 3.33 ± 0.80  | 3.18 ± 0.75   | 3.02 ± 1.13  | 3.02 ± 0.34   |  |            |  |            |  |
| 16:3          | 2.52 ± 0.47   | 2.23 ± 0.73  | 2.22 ± 0.58   | 2.50 ± 0.21  | 2.36 ± 0.74   |  |            |  |            |  |
| 18:0          | 1.71 ± 0.54   | 1.82 ± 0.07  | 2.04 ± 0.63   | 1.85 ± 0.54  | 1.47 ± 0.63   |  |            |  |            |  |
| 18:1          | 1.30 ± 0.42   | 1.42 ± 0.11  | 1.68 ± 0.57   | 1.08 ± 0.29  | 1.97 ± 0.93   |  |            |  |            |  |
| 18:2          | 5.76 ± 0.55   | 6.12 ± 1.22  | 5.35 ± 1.30   | 6.27 ± 0.61  | 5.50 ± 0.34   |  |            |  |            |  |
| 18:3          | 68.92 ± 4.26  | 69.91 ± 3.80 | 70.69 ± 4.65  | 69.81 ± 1.56 | 70.81 ± 2.71  |  |            |  |            |  |
| <b>PtdCho</b> |               |              |               |              |               |  |            |  |            |  |
| 16:0          | 22.79 ± 0.59  | 20.22 ± 2.80 | 19.56 ± 3.05  | 20.94 ± 2.28 | 19.91 ± 0.85  |  |            |  |            |  |
| 16:1          | 0.91 ± 0.30   | 1.11 ± 0.11  | 0.96 ± 0.30   | 1.16 ± 0.32  | 1.25 ± 0.27   |  |            |  |            |  |
| 16:2          | 2.04 ± 0.56   | 2.15 ± 0.50  | 1.84 ± 0.66   | 1.58 ± 0.54  | 1.61 ± 0.57   |  |            |  |            |  |
| 16:3          | 0.00 ± 0.00   | 0.00 ± 0.00  | 0.00 ± 0.00   | 0.00 ± 0.00  | 0.00 ± 0.00   |  |            |  |            |  |
| 18:0          | 2.38 ± 0.55   | 2.00 ± 0.12  | 2.09 ± 0.16   | 2.14 ± 0.39  | 2.17 ± 0.52   |  |            |  |            |  |
| 18:1          | 5.74 ± 1.10   | 5.52 ± 0.34  | 5.27 ± 1.28   | 5.18 ± 1.36  | 6.86 ± 1.44   |  |            |  |            |  |
| 18:2          | 35.31 ± 0.43  | 35.54 ± 1.45 | 37.09 ± 1.05  | 37.85 ± 2.11 | 37.89 ± 2.11  |  |            |  |            |  |
| 18:3          | 30.60 ± 1.62  | 33.18 ± 1.41 | 32.81 ± 1.87  | 30.97 ± 0.99 | 30.06 ± 3.45  |  |            |  |            |  |
| <b>PtdEtn</b> |               |              |               |              |               |  |            |  |            |  |
| 16:0          | 30.19 ± 1.74  | 27.53 ± 2.12 | 27.65 ± 2.38  | 29.01 ± 1.27 | 27.40 ± 2.19  |  |            |  |            |  |
| 16:1          | 1.95 ± 0.92   | 1.97 ± 0.22  | 1.82 ± 0.03   | 1.89 ± 0.15  | 2.29 ± 0.51   |  |            |  |            |  |
| 16:2          | 3.35 ± 1.00   | 3.43 ± 0.50  | 2.50 ± 0.20   | 2.73 ± 0.48  | 2.70 ± 0.76   |  |            |  |            |  |
| 16:3          | 0.00 ± 0.00   | 0.00 ± 0.00  | 0.00 ± 0.00   | 0.00 ± 0.00  | 0.00 ± 0.00   |  |            |  |            |  |
| 18:0          | 2.85 ± 0.56   | 2.27 ± 0.27  | 2.79 ± 0.55   | 2.62 ± 0.65  | 2.29 ± 0.43   |  |            |  |            |  |
| 18:1          | 4.62 ± 0.61   | 4.68 ± 0.65  | 5.22 ± 1.67   | 3.70 ± 0.51  | 5.21 ± 1.04   |  |            |  |            |  |
| 18:2          | 37.34 ± 1.72  | 37.66 ± 1.51 | 38.05 ± 1.35  | 38.95 ± 1.20 | 39.13 ± 2.03  |  |            |  |            |  |
| 18:3          | 19.70 ± 1.35  | 22.46 ± 2.01 | 21.97 ± 1.93  | 21.11 ± 0.69 | 20.98 ± 0.31  |  |            |  |            |  |
| <b>PtdGro</b> |               |              |               |              |               |  |            |  |            |  |
| 16:0          | 27.20 ± 3.72  | 27.33 ± 2.25 | 25.32 ± 0.59  | 25.82 ± 3.80 | 24.92 ± 2.10  |  |            |  |            |  |
| 16:1          | 32.51 ± 2.56  | 27.86 ± 1.15 | 28.29 ± 3.96  | 31.89 ± 5.05 | 30.08 ± 2.66  |  |            |  |            |  |
| 16:2          | 4.19 ± 1.39   | 5.06 ± 1.36  | 4.52 ± 2.37   | 4.00 ± 0.43  | 3.80 ± 1.01   |  |            |  |            |  |
| 16:3          | 0.00 ± 0.00   | 0.00 ± 0.00  | 0.00 ± 0.00   | 0.00 ± 0.00  | 0.00 ± 0.00   |  |            |  |            |  |
| 18:0          | 2.60 ± 1.06   | 2.44 ± 0.86  | 2.63 ± 0.82   | 2.40 ± 1.00  | 2.24 ± 0.43   |  |            |  |            |  |
| 18:1          | 4.05 ± 0.94   | 4.94 ± 0.84  | 5.54 ± 1.72   | 4.51 ± 0.54  | 5.11 ± 1.00   |  |            |  |            |  |
| 18:2          | 6.71 ± 0.24   | 7.97 ± 0.56  | 8.69 ± 2.12   | 8.27 ± 0.88  | 8.69 ± 1.49   |  |            |  |            |  |
| 18:3          | 22.74 ± 2.68  | 24.39 ± 3.81 | 25.01 ± 2.13  | 23.10 ± 0.82 | 25.16 ± 1.99  |  |            |  |            |  |
| <b>PtdIno</b> |               |              |               |              |               |  |            |  |            |  |
| 16:0          | 48.11 ± 3.27  | 44.51 ± 3.77 | 42.21 ± 3.31  | 47.97 ± 1.45 | 44.91 ± 3.34  |  |            |  |            |  |
| 16:1          | 2.70 ± 0.92   | 2.41 ± 0.42  | 2.27 ± 0.72   | 2.77 ± 0.24  | 2.58 ± 0.20   |  |            |  |            |  |
| 16:2          | 7.03 ± 2.77   | 8.18 ± 2.23  | 6.11 ± 1.88   | 6.10 ± 0.96  | 6.17 ± 1.61   |  |            |  |            |  |
| 16:3          | 0.00 ± 0.00   | 0.00 ± 0.00  | 0.00 ± 0.00   | 0.00 ± 0.00  | 0.00 ± 0.00   |  |            |  |            |  |
| 18:0          | 3.53 ± 0.77   | 4.13 ± 0.88  | 3.61 ± 1.81   | 4.14 ± 1.96  | 4.95 ± 1.91   |  |            |  |            |  |
| 18:1          | 2.59 ± 0.90   | 2.98 ± 0.46  | 3.84 ± 1.36   | 2.24 ± 0.42  | 3.00 ± 1.06   |  |            |  |            |  |
| 18:2          | 19.48 ± 0.94  | 19.61 ± 1.90 | 23.07 ± 0.55  | 19.80 ± 1.26 | 21.31 ± 0.28  |  |            |  |            |  |
| 18:3          | 15.61 ± 1.82  | 16.89 ± 2.59 | 17.85 ± 2.34  | 16.20 ± 1.88 | 16.27 ± 2.15  |  |            |  |            |  |

Data are mean±SD from 3 biological replicates.

**Supplemental Table 4:** Levels of TAG and DAG ( $\mu\text{g}/\text{mg}$  dry weight) in mature siliques of homozygous *cek1-1*, *cek2-1* and *cek3-1* mutants and the wild type (WT) Col-8.

|               | <b>TAG</b>        | <b>DAG</b>      |
|---------------|-------------------|-----------------|
| <i>cek1-1</i> | 70.97 $\pm$ 12.71 | 1.05 $\pm$ 0.16 |
| <i>cek2-1</i> | 64.34 $\pm$ 10.07 | 0.95 $\pm$ 0.17 |
| <i>cek3-1</i> | 77.55 $\pm$ 5.11  | 1.15 $\pm$ 0.04 |
| WT (Col-8)    | 66.51 $\pm$ 5.72  | 0.94 $\pm$ 0.28 |

Data are mean $\pm$ SD from 3 biological replicates.

**Supplemental Table 5:** Fatty acid composition (mol%) of TAG in mature siliques of *cek1-1*, *cek2-1*, *cek3-1* and the wild type (WT) Col-8.

| TAG  | <i>cek1-1</i> | <i>cek2-1</i> | <i>cek3-1</i> | WT (Col-8)   |
|------|---------------|---------------|---------------|--------------|
| 16:0 | 9.63 ± 0.33   | 9.49 ± 0.06   | 9.52 ± 0.04   | 9.53 ± 0.17  |
| 16:1 | 0.56 ± 0.17   | 0.55 ± 0.19   | 0.52 ± 0.19   | 0.55 ± 0.17  |
| 16:2 | 0.10 ± 0.01   | 0.10 ± 0.01   | 0.09 ± 0.01   | 0.09 ± 0.00  |
| 16:3 | 0.05 ± 0.00   | 0.05 ± 0.01   | 0.05 ± 0.00   | 0.05 ± 0.00  |
| 18:0 | 2.70 ± 0.22   | 2.57 ± 0.02   | 2.64 ± 0.14   | 2.69 ± 0.33  |
| 18:1 | 16.83 ± 2.30  | 14.72 ± 0.14  | 14.61 ± 1.19  | 16.63 ± 3.02 |
| 18:2 | 34.44 ± 0.71  | 33.50 ± 0.29  | 34.30 ± 0.34  | 33.57 ± 1.11 |
| 18:3 | 15.48 ± 1.99  | 17.91 ± 1.36  | 16.00 ± 1.02  | 16.14 ± 3.61 |
| 20:0 | 1.51 ± 0.98   | 0.99 ± 1.05   | 2.24 ± 0.07   | 1.46 ± 1.08  |
| 20:1 | 16.78 ± 1.28  | 18.03 ± 0.22  | 17.96 ± 0.76  | 17.36 ± 1.72 |
| 20:2 | 1.70 ± 0.22   | 1.88 ± 0.06   | 1.86 ± 0.06   | 1.71 ± 0.30  |
| 22:1 | 0.23 ± 0.03   | 0.22 ± 0.04   | 0.20 ± 0.03   | 0.21 ± 0.04  |

Data are mean±SD from 3 biological replicates.



**Supplemental Table 6:** Amounts of polar glycerolipid classes ( $\mu\text{g}/\text{mg}$  dry weight) in young siliques and mature siliques of *cek4-1/+* and wild type (WT) Col-8.

|               | Young siliques |                 | Mature siliques |                 |
|---------------|----------------|-----------------|-----------------|-----------------|
|               | WT (Col-8)     | <i>cek4-1/+</i> | WT (Col-8)      | <i>cek4-1/+</i> |
| <b>MGDG</b>   | 10.7 $\pm$ 2.1 | 9.9 $\pm$ 0.9   | 13.3 $\pm$ 0.9  | 12.7 $\pm$ 0.1  |
| <b>DGDG</b>   | 7.5 $\pm$ 0.4  | 9.1 $\pm$ 2.3   | 10.2 $\pm$ 1.1  | 11.7 $\pm$ 0.5  |
| <b>PtdCho</b> | 40.5 $\pm$ 1.2 | 39.9 $\pm$ 3.3  | 36.9 $\pm$ 2.1  | 35.9 $\pm$ 2.4  |
| <b>PtdEtn</b> | 16.1 $\pm$ 0.9 | 17.2 $\pm$ 1.8  | 18.1 $\pm$ 0.4  | 17.5 $\pm$ 0.5  |
| <b>PtdGro</b> | 2.0 $\pm$ 0.9  | 2.1 $\pm$ 0.5   | 1.0 $\pm$ 0.4   | 1.6 $\pm$ 0.2   |
| <b>PtdIno</b> | 23.3 $\pm$ 0.8 | 22.0 $\pm$ 2.1  | 20.4 $\pm$ 0.3  | 20.6 $\pm$ 1.3  |

Data are mean $\pm$ SD from 3 biological replicates.

**Supplemental Table 7:** Fatty acid composition (mol%) of the polar glycerolipid classes in seedlings of *Pro35S:CEK4* line 9 and the wild type (WT) Col-0.

|               | <i>Pro35S:CEK4 #9</i> |        | WT (Col-0) |               | <i>Pro35S:CEK4 #9</i> |       | WT (Col-0) |       |        |
|---------------|-----------------------|--------|------------|---------------|-----------------------|-------|------------|-------|--------|
| <b>MGDG</b>   |                       |        |            | <b>PtdEtn</b> |                       |       |            |       |        |
| 16:0          | 1.72                  | ± 0.39 | 1.82       | ± 0.12        | 16:0                  | 32.33 | ± 1.59     | 30.96 | ± 0.50 |
| 16:1          | 1.97                  | ± 0.26 | 1.64       | ± 0.37        | 16:1                  | 0.00  | ± 0.00     | 2.39  | ± 2.13 |
| 16:2          | 2.02                  | ± 0.10 | 1.98       | ± 0.06        | 16:2                  | 0.86  | ± 0.75     | 0.74  | ± 0.64 |
| 16:3          | 32.55                 | ± 0.48 | 32.45      | ± 0.40        | 16:3                  | 0.00  | ± 0.00     | 0.00  | ± 0.00 |
| 18:0          | 0.00                  | ± 0.00 | 0.00       | ± 0.00        | 18:0                  | 1.84  | ± 0.48     | 2.62  | ± 0.71 |
| 18:1          | 1.13                  | ± 0.02 | 1.13       | ± 0.11        | 18:1                  | 3.58  | ± 0.56     | 3.96  | ± 0.30 |
| 18:2          | 2.23                  | ± 0.34 | 2.32       | ± 0.15        | 18:2                  | 36.57 | ± 1.32     | 36.36 | ± 1.84 |
| 18:3          | 58.31                 | ± 0.49 | 58.61      | ± 0.39        | 18:3                  | 24.82 | ± 0.81     | 22.98 | ± 1.94 |
| <b>DGDG</b>   |                       |        |            | <b>PtdGro</b> |                       |       |            |       |        |
| 16:0          | 12.71                 | ± 0.19 | 13.35      | ± 1.23        | 16:0                  | 33.26 | ± 0.90     | 32.25 | ± 1.39 |
| 16:1          | 1.17                  | ± 1.06 | 1.09       | ± 0.99        | 16:1                  | 24.30 | ± 2.47     | 24.68 | ± 1.26 |
| 16:2          | 1.44                  | ± 0.10 | 1.32       | ± 0.23        | 16:2                  | 0.62  | ± 0.54     | 1.16  | ± 0.23 |
| 16:3          | 2.55                  | ± 0.33 | 2.78       | ± 0.45        | 16:3                  | 0.00  | ± 0.00     | 0.00  | ± 0.00 |
| 18:0          | 0.97                  | ± 0.09 | 1.03       | ± 0.32        | 18:0                  | 0.76  | ± 0.67     | 1.57  | ± 0.37 |
| 18:1          | 0.65                  | ± 0.61 | 0.69       | ± 0.35        | 18:1                  | 5.62  | ± 0.88     | 5.67  | ± 0.52 |
| 18:2          | 3.70                  | ± 0.35 | 3.69       | ± 0.18        | 18:2                  | 6.85  | ± 0.87     | 7.21  | ± 0.23 |
| 18:3          | 76.81                 | ± 0.59 | 76.04      | ± 1.15        | 18:3                  | 28.59 | ± 0.25     | 27.46 | ± 1.21 |
| <b>PtdCho</b> |                       |        |            | <b>PtdIno</b> |                       |       |            |       |        |
| 16:0          | 21.97                 | ± 1.02 | 21.15      | ± 0.92        | 16:0                  | 49.98 | ± 1.66     | 48.82 | ± 0.76 |
| 16:1          | 0.00                  | ± 0.00 | 0.81       | ± 1.40        | 16:1                  | 5.77  | ± 0.31     | 5.82  | ± 1.97 |
| 16:2          | 0.71                  | ± 0.20 | 0.80       | ± 0.23        | 16:2                  | 3.01  | ± 0.79     | 2.48  | ± 0.55 |
| 16:3          | 0.00                  | ± 0.00 | 0.00       | ± 0.00        | 16:3                  | 0.00  | ± 0.00     | 0.00  | ± 0.00 |
| 18:0          | 1.79                  | ± 0.07 | 1.98       | ± 0.07        | 18:0                  | 3.39  | ± 1.10     | 3.69  | ± 0.52 |
| 18:1          | 8.24                  | ± 0.16 | 8.11       | ± 0.16        | 18:1                  | 3.54  | ± 0.87     | 1.30  | ± 1.12 |
| 18:2          | 37.20                 | ± 0.66 | 37.55      | ± 0.87        | 18:2                  | 19.37 | ± 0.70     | 20.38 | ± 0.40 |
| 18:3          | 30.09                 | ± 0.29 | 29.60      | ± 1.00        | 18:3                  | 14.95 | ± 0.71     | 17.18 | ± 1.01 |

Data are mean±SD from 3 biological replicates.

**Supplemental Table 8:** Fatty acid composition (mol%) of the polar glycerolipid classes in young siliques of *Pro35S:CEK4* line 9 and the wild type (WT) Col-8.

|               | <i>Pro35S:CEK4 #9</i> |        | WT (Col-8) |        | <i>Pro35S:CEK4 #9</i> |       | WT (Col-8) |              |
|---------------|-----------------------|--------|------------|--------|-----------------------|-------|------------|--------------|
| <b>MGDG</b>   |                       |        |            |        | <b>PtdEtn</b>         |       |            |              |
| 16:0          | 15.89                 | ± 1.08 | 15.52      | ± 1.76 | 16:0                  | 28.64 | ± 3.60     | 27.04 ± 0.29 |
| 16:1          | 5.52                  | ± 0.89 | 4.86       | ± 0.92 | 16:1                  | 3.55  | ± 0.93     | 2.73 ± 0.79  |
| 16:2          | 7.38                  | ± 2.73 | 8.38       | ± 1.53 | 16:2                  | 3.55  | ± 0.67     | 4.56 ± 0.87  |
| 16:3          | 7.88                  | ± 1.18 | 7.42       | ± 0.27 | 16:3                  | 0.00  | ± 0.00     | 0.00 ± 0.00  |
| 18:0          | 6.25                  | ± 1.57 | 6.21       | ± 0.94 | 18:0                  | 4.16  | ± 0.48     | 4.59 ± 0.44  |
| 18:1          | 4.31                  | ± 1.02 | 4.54       | ± 0.43 | 18:1                  | 3.99  | ± 0.30     | 3.42 ± 0.32  |
| 18:2          | 14.32                 | ± 1.39 | 14.22      | ± 1.80 | 18:2                  | 45.82 | ± 2.87     | 46.91 ± 2.22 |
| 18:3          | 38.45                 | ± 4.05 | 38.84      | ± 2.81 | 18:3                  | 10.30 | ± 1.07     | 10.76 ± 0.57 |
| <b>DGDG</b>   |                       |        |            |        | <b>PtdGro</b>         |       |            |              |
| 16:0          | 18.81                 | ± 2.21 | 18.59      | ± 1.24 | 16:0                  | 32.17 | ± 1.32     | 31.52 ± 1.99 |
| 16:1          | 4.52                  | ± 2.00 | 4.67       | ± 2.12 | 16:1                  | 15.71 | ± 4.55     | 13.65 ± 3.95 |
| 16:2          | 7.77                  | ± 1.94 | 8.39       | ± 1.47 | 16:2                  | 27.34 | ± 6.17     | 27.08 ± 3.97 |
| 16:3          | 1.05                  | ± 0.26 | 0.32       | ± 0.56 | 16:3                  | 0.00  | ± 0.00     | 0.00 ± 0.00  |
| 18:0          | 5.60                  | ± 1.48 | 6.48       | ± 0.54 | 18:0                  | 12.65 | ± 0.65     | 14.31 ± 2.05 |
| 18:1          | 3.27                  | ± 0.41 | 3.10       | ± 0.64 | 18:1                  | 7.35  | ± 3.24     | 8.70 ± 3.27  |
| 18:2          | 13.54                 | ± 1.42 | 13.93      | ± 0.96 | 18:2                  | 4.78  | ± 1.21     | 4.74 ± 2.08  |
| 18:3          | 45.45                 | ± 4.86 | 44.53      | ± 3.22 | 18:3                  | 0.00  | ± 0.00     | 0.00 ± 0.00  |
| <b>PtdCho</b> |                       |        |            |        | <b>PtdIno</b>         |       |            |              |
| 16:0          | 19.27                 | ± 0.89 | 19.47      | ± 0.69 | 16:0                  | 42.89 | ± 2.47     | 40.90 ± 1.10 |
| 16:1          | 1.36                  | ± 0.31 | 0.86       | ± 0.85 | 16:1                  | 1.46  | ± 1.27     | 2.25 ± 0.93  |
| 16:2          | 1.72                  | ± 0.45 | 2.01       | ± 0.32 | 16:2                  | 2.93  | ± 0.46     | 3.73 ± 0.43  |
| 16:3          | 0.00                  | ± 0.00 | 0.00       | ± 0.00 | 16:3                  | 0.00  | ± 0.00     | 0.00 ± 0.00  |
| 18:0          | 3.39                  | ± 0.30 | 3.51       | ± 0.12 | 18:0                  | 5.40  | ± 0.39     | 5.94 ± 0.24  |
| 18:1          | 4.58                  | ± 0.43 | 5.07       | ± 0.53 | 18:1                  | 2.47  | ± 0.83     | 3.05 ± 0.38  |
| 18:2          | 57.17                 | ± 0.63 | 56.70      | ± 1.58 | 18:2                  | 30.86 | ± 1.68     | 30.61 ± 0.79 |
| 18:3          | 12.52                 | ± 0.42 | 12.38      | ± 0.11 | 18:3                  | 13.99 | ± 0.87     | 13.53 ± 0.14 |

Data are mean±SD from 3 biological replicates.

**Supplemental Table 9:** Fatty acid composition (mol %) of the polar glycerolipid classes in mature siliques of *Pro35S:CEK4* line 9 and the wild type (WT) Col-8.

|               | <i>Pro35S:CEK4</i> #9 |        | WT (Col-8) |               | <i>Pro35S:CEK4</i> #9 |       | WT (Col-8) |       |        |
|---------------|-----------------------|--------|------------|---------------|-----------------------|-------|------------|-------|--------|
| <b>MGDG</b>   |                       |        |            | <b>PtdEtn</b> |                       |       |            |       |        |
| 16:0          | 4.41                  | ± 0.39 | 5.06       | ± 0.65        | 16:0                  | 26.30 | ± 1.25     | 26.74 | ± 0.14 |
| 16:1          | 2.31                  | ± 0.65 | 3.38       | ± 1.26        | 16:1                  | 1.72  | ± 0.37     | 2.19  | ± 0.70 |
| 16:2          | 3.04                  | ± 0.37 | 3.75       | ± 0.58        | 16:2                  | 1.82  | ± 0.30     | 1.96  | ± 0.03 |
| 16:3          | 15.26                 | ± 1.74 | 15.06      | ± 0.80        | 16:3                  | 0.00  | ± 0.00     | 0.00  | ± 0.00 |
| 18:0          | 1.34                  | ± 0.45 | 1.03       | ± 0.26        | 18:0                  | 2.95  | ± 0.30     | 2.30  | ± 0.06 |
| 18:1          | 2.04                  | ± 0.52 | 2.39       | ± 0.26        | 18:1                  | 4.00  | ± 0.67     | 3.36  | ± 0.12 |
| 18:2          | 9.25                  | ± 1.02 | 9.22       | ± 0.62        | 18:2                  | 42.71 | ± 2.22     | 46.05 | ± 0.89 |
| 18:3          | 62.35                 | ± 1.03 | 60.12      | ± 1.43        | 18:3                  | 20.49 | ± 0.98     | 17.39 | ± 1.46 |
| <b>DGDG</b>   |                       |        |            | <b>PtdGro</b> |                       |       |            |       |        |
| 16:0          | 10.49                 | ± 1.57 | 12.25      | ± 1.23        | 16:0                  | 42.31 | ± 2.36     | 43.49 | ± 2.50 |
| 16:1          | 2.07                  | ± 0.82 | 2.86       | ± 1.78        | 16:1                  | 15.10 | ± 2.02     | 15.25 | ± 2.15 |
| 16:2          | 2.92                  | ± 0.44 | 2.98       | ± 0.28        | 16:2                  | 25.56 | ± 1.16     | 25.30 | ± 2.46 |
| 16:3          | 1.85                  | ± 0.04 | 1.98       | ± 0.10        | 16:3                  | 0.00  | ± 0.00     | 0.00  | ± 0.00 |
| 18:0          | 2.65                  | ± 1.05 | 2.54       | ± 0.57        | 18:0                  | 17.03 | ± 2.86     | 15.96 | ± 2.94 |
| 18:1          | 2.41                  | ± 0.39 | 2.35       | ± 0.20        | 18:1                  | 0.00  | ± 0.00     | 0.00  | ± 0.00 |
| 18:2          | 9.08                  | ± 0.62 | 9.11       | ± 0.42        | 18:2                  | 0.00  | ± 0.00     | 0.00  | ± 0.00 |
| 18:3          | 68.54                 | ± 1.31 | 65.93      | ± 3.69        | 18:3                  | 0.00  | ± 0.00     | 0.00  | ± 0.00 |
| <b>PtdCho</b> |                       |        |            | <b>PtdIno</b> |                       |       |            |       |        |
| 16:0          | 16.42                 | ± 0.39 | 18.77      | ± 0.84        | 16:0                  | 41.01 | ± 0.44     | 42.05 | ± 1.94 |
| 16:1          | 1.28                  | ± 0.22 | 1.19       | ± 0.50        | 16:1                  | 1.23  | ± 0.63     | 1.29  | ± 0.03 |
| 16:2          | 0.88                  | ± 0.06 | 1.13       | ± 0.09        | 16:2                  | 1.72  | ± 0.07     | 2.08  | ± 0.40 |
| 16:3          | 0.00                  | ± 0.00 | 0.00       | ± 0.00        | 16:3                  | 0.00  | ± 0.00     | 0.00  | ± 0.00 |
| 18:0          | 2.34                  | ± 0.08 | 2.18       | ± 0.14        | 18:0                  | 3.67  | ± 0.19     | 3.49  | ± 0.45 |
| 18:1          | 7.62                  | ± 0.36 | 7.24       | ± 0.29        | 18:1                  | 3.57  | ± 0.23     | 3.83  | ± 0.26 |
| 18:2          | 49.18                 | ± 1.78 | 50.99      | ± 1.44        | 18:2                  | 32.19 | ± 0.62     | 32.81 | ± 0.45 |
| 18:3          | 22.27                 | ± 1.33 | 18.50      | ± 1.21        | 18:3                  | 16.61 | ± 1.00     | 14.45 | ± 1.28 |

Data are mean±SD from 3 biological replicates.

**Supplemental Table 10:** Sequence of oligonucleotide primers used in this study.

| No.    | Sequence (5' to 3')                                |
|--------|----------------------------------------------------|
| YN533  | CCCTCGAGAACAATGGCGATCAAGACAAAGACTAGTC              |
| YN550  | GCTACACGAAGATCATCTGCAGAAAGAG                       |
| YN748  | GCGTGGACCGCTTGCTGCAACT                             |
| YN894  | CCTCAGCTGTGGGTTGATATCTTGAAGTTC                     |
| YN895  | GTATGATCCATACTCGAAATCAATCAAGTATAG                  |
| YN896  | GTAAACCCCCCAAAGTAGTTGATATCTTGTTTG                  |
| YN1004 | ACGATGGGTGGTACTGAAAAGAATGTAGAG                     |
| YN1005 | CGTAATCTGTCCCAAAGCAAAGCC                           |
| YN1016 | ATATTGACCATCATACTCATTGC                            |
| YN1164 | CACCGCTGATGCATGCATGCTTCGTTGTTTATC                  |
| YN1219 | CTGAAACAAGAAGTGTATCAAACCGG                         |
| YN1295 | GACTCCAAATTGGCTTATTCATCCTCC                        |
| YN1427 | TACATCTCACCTCTCAGCATCGCTGCCTTTGGTTGGCCAAAATGGTTAAA |
| YN1429 | CCAAC TATTCAAGTGAAGGAGG                            |
| YN1442 | CCGCTCGAGATGGGAGCAGCGAAGAATATCTGG                  |
| YN1443 | CGGGATCCCTACAGCGATGCTGAGAGGTGAGAT                  |
| JL004  | ATGTTAGCAATCTATTCTTTGC                             |
| KK008  | ATTTTGCCGATTTTCGGAAC                               |
| KK096  | CCCGGCGCCATGGCCGCGGGATAT                           |
| KK097  | CTGCAGGCGGCCGCACTAGTGATATC                         |
| KK098  | CACTTCCTGATTATTGACCCACACTTTGCCG                    |
| KK104  | GCGAAGCACTGCAGGCCGTAGCC                            |
